# Supplementary material for: Changes in clinical and biochemical characteristics of polycystic ovary syndrome with advancing age
Source: PubMed Central journal article supplement — Endocr Connect. 2019 Dec 23;9(2):74–89. doi: 10.1530/EC-19-0496 (PMC6993261; doi:10.1530/ec-19-0496), 2019-12-23
Supplement: supplementary_table_1.pdf [file supplementary_table_1.pdf]

**Supplementary Table 1.** Comparison of baseline clinical and anthropometric characteristics of women with polycystic ovary syndrome according to ethnicities

| Variables*                    | Ethnicity   |             |                             |
|-------------------------------|-------------|-------------|-----------------------------|
|                               | CA (n= 581) | AD (n= 105) | OT (n= 84)                  |
| <b>SBP (mmHg)</b>             | 116 ± 10    | 112 ± 13    | 117 ± 15 <sup>a</sup>       |
| <b>DBP (mmHg)</b>             | 75 ± 8      | 79 ± 10     | 75 ± 12 <sup>a,b</sup>      |
| <b>BW (kg)</b>                | 70 ± 15     | 82 ± 18     | 74 ± 18 <sup>a,c,d</sup>    |
| <b>BMI (kg/m<sup>2</sup>)</b> | 26.9 ± 5.7  | 32.9 ± 6.8  | 29.6 ± 7.1 <sup>a,e,f</sup> |
| <b>WC (cm)</b>                | 81 ± 13     | 94 ± 15     | 89 ± 15 <sup>a,g</sup>      |
| <b>WHR ratio</b>              | 0.7 ± 0.1   | 0.8 ± 0.1   | 0.8 ± 0.1 <sup>a,g</sup>    |
| <b>VAI</b>                    | 1.7 ± 0.2   | 2.0 ± 0.2   | 2.5 ± 0.4 <sup>g,h</sup>    |
| <b>LAP</b>                    | 31.2 ± 7.1  | 45.8 ± 6.8  | 48.1 ± 12.1 <sup>g,h</sup>  |
| <b>FM (%)</b>                 | 34.2 ± 7.7  | 41.9 ± 7.0  | 37.8 ± 8.5 <sup>a,b,e</sup> |

\*CA= Caucasian, AD= African descendant, OT= Other races; SBP= systolic blood pressure; DBP= diastolic blood pressure; BW= body weight; BMI= body mass index; WC= waist circumference; WHR= waist-hip ratio; VAI= visceral adiposity index; LAP= lipid accumulation product; FM= fat mass

ANOVA test followed by Tukey post hoc test: a= CA vs AD, p <0.001; b= AD vs OT, p= 0.002; c= CA vs OT, p= 0.048; d= AD vs OT, p= 0.044; e= CA vs OT, p= 0.004; f= AD vs OT, p= 0.002; g= CA vs OT, p <0.001; h= CA vs AD, p= 0.002
