# Supplementary material for: Changes in clinical and biochemical characteristics of polycystic ovary syndrome with advancing age
Source: PubMed Central journal article supplement — Endocr Connect. 2019 Dec 23;9(2):74–89. doi: 10.1530/EC-19-0496 (PMC6993261; doi:10.1530/ec-19-0496), 2019-12-23
Supplement: supplementary_table_2.pdf [file supplementary_table_2.pdf]

**Supplementary Table 2.** Comparison of hormone concentrations in women with polycystic ovary syndrome, according to the ethnicities

| Variables*              | Ethnicity   |             |                          |
|-------------------------|-------------|-------------|--------------------------|
|                         | CA (n= 581) | AD (n= 105) | OT (n= 84)               |
| <b>T (nmol/L)</b>       | 1.7 ± 0.1   | 1.9 ± 0.8   | 1.9 ± 0.1                |
| <b>FT (nmol/cL)</b>     | 3.3 ± 0.5   | 5.4 ± 0.7   | 3.8 ± 0.5 <sup>a,b</sup> |
| <b>SHBG (nmol/L)</b>    | 39.1 ± 3.5  | 28.1 ± 2.7  | 32.3 ± 1.6 <sup>c</sup>  |
| <b>FAI (%)</b>          | 5.0 ± 2.1   | 6.0 ± 2.0   | 5.3 ± 2.0 <sup>d</sup>   |
| <b>F (nmol/L)</b>       | 333 ± 14    | 309 ± 12    | 330 ± 13                 |
| <b>A4 (nmol/L)</b>      | 8.8 ± 0.6   | 7.6 ± 0.5   | 8.1 ± 0.8 <sup>e</sup>   |
| <b>DHEA (nmol/L)</b>    | 16.7 ± 1.7  | 15.8 ± 1.7  | 15.4 ± 1.6               |
| <b>DHEAS (µmol/L)</b>   | 4.8 ± 0.2   | 4.3 ± 0.2   | 4.0 ± 0.2                |
| <b>17-OHP4 (nmol/L)</b> | 3.6 ± 0.3   | 3.0 ± 0.2   | 3.3 ± 0.2 <sup>f</sup>   |

\*CA= Caucasian, AD= African descendant, OT= Other races; T= total testosterone; FT= free testosterone; SHBG= sex hormone-binding globulin; FAI= free androgen index; F= cortisol; A4= androstenedione; DHEA= dehydroepiandrosterone; DHEAS= dehydroepiandrosterone sulfate; 17-OHP4= 17-hydroxyprogesterone;

ANOVA test followed by the Tukey post hoc test: a= CA vs AD, p <0.001; b= AD vs OT, p= 0.005; c= CA vs AD, p= 0.003; d= CA vs AD, p= 0.030; e= CA vs AD, p= 0.045; f= CA vs AD, p= 0.026
