# Supplementary material for: Changes in clinical and biochemical characteristics of polycystic ovary syndrome with advancing age
Source: PubMed Central journal article supplement — Endocr Connect. 2019 Dec 23;9(2):74–89. doi: 10.1530/EC-19-0496 (PMC6993261; doi:10.1530/ec-19-0496), 2019-12-23
Supplement: supplementary_table_3.pdf [file supplementary_table_3.pdf]

**Supplementary Table 3.** Changes in carbohydrate biomarkers of women with polycystic ovary syndrome, according to ethnicities

| Variables*                      | Ethnicity   |             |                          |
|---------------------------------|-------------|-------------|--------------------------|
|                                 | CA (n= 581) | AD (n= 105) | OT (n= 84)               |
| Glucose (nmol/L)                | 4.9 ± 0.5   | 5.1 ± 5.1   | 5.0 ± 0.4 <sup>a,b</sup> |
| Glucose <sub>120</sub> (nmol/L) | 6.4 ± 0.1   | 6.3 ± 0.1   | 6.4 ± 0.1                |
| Insulin (pmol/L)                | 70 ± 7      | 104 ± 9     | 100 ± 10 <sup>a,c</sup>  |
| G/I ratio                       | 8.3 ± 1.8   | 6.6 ± 1.7   | 6.7 ± 1.8 <sup>d,e</sup> |
| C-pep (nmol/L)                  | 0.7 ± 0.4   | 0.8 ± 0.4   | 0.8 ± 0.4 <sup>f,g</sup> |
| HbA1C (%)                       | 5.4 ± 1.0   | 6.2 ± 1.4   | 5.5 ± 0.9 <sup>a,h</sup> |
| HOMA-IR                         | 1.4 ± 0.1   | 1.9 ± 0.1   | 1.8 ± 0.1 <sup>a,c</sup> |
| HOMA% B                         | 123 ± 5     | 137 ± 5     | 138 ± 5                  |
| TG (mmol/L)                     | 1.3 ± 0.8   | 1.3 ± 0.8   | 1.4 ± 0.1 <sup>i</sup>   |
| HDL-C (mmol/L)                  | 1.2 ± 0.3   | 1.1 ± 0.2   | 1.1 ± 0.3 <sup>a,j</sup> |
| LDL-C (mmol/L)                  | 2.7 ± 0.8   | 2.8 ± 0.7   | 2.8 ± 0.7                |

\*CA= Caucasian, AD= African descendant, OT= Other races; G/I ratio= glucose/insulin ratio; C-pep= peptide; HbA1C= glycated hemoglobin; HOMA= homeostatic assessment model; TG= triglycerides; HDL-C= high density lipoprotein cholesterol; LDL-C= low density lipoprotein cholesterol

ANOVA test followed by the Tukey post hoc test: a= CA vs AD, p <0.001; b= AD vs OT, p= 0.022; c= CA vs OT, p= 0.008; d= CA vs AD, p= 0.005; e= CA vs OT= 0.015; f= CA vs AD, p= 0.015; g= CA vs OT, p= 0.001; h= AD vs OT, p= 0.002; i= CA vs OT, p= 0.037; j= CA vs OT, p <0.001
