# Supplementary material for: Changes in clinical and biochemical characteristics of polycystic ovary syndrome with advancing age
Source: PubMed Central journal article supplement — Endocr Connect. 2019 Dec 23;9(2):74–89. doi: 10.1530/EC-19-0496 (PMC6993261; doi:10.1530/ec-19-0496), 2019-12-23
Supplement: supplementary_table_6.pdf [file supplementary_table_6.pdf]

**Supplementary Table 6.** Changes in androgen concentrations in normal cycling non-PCOS women and PCOS women with advancing age and comparison of the variables within the same age group

| Variable*               | (N) ≤ 19<br>(60) $\bar{x} \pm SD$ | (N) 20 – 24<br>(158) $\bar{x} \pm SD$ | (N) 25 – 29<br>(301) $\bar{x} \pm SD$ | (N) 30 – 34<br>(207) $\bar{x} \pm SD$ | (N) 35 – 39<br>(70) $\bar{x} \pm SD$ |
|-------------------------|-----------------------------------|---------------------------------------|---------------------------------------|---------------------------------------|--------------------------------------|
| <b>T (nmol/L)</b>       |                                   |                                       |                                       |                                       |                                      |
| Controls                | 0.9 ± 0.1                         | 1.2 ± 0.1                             | 1.1 ± 0.1                             | 0.8 ± 0.1                             | 0.8 ± 0.1                            |
| PCOS                    | 2.0 ± 0.1                         | 2.1 ± 0.8                             | 1.8 ± 0.1                             | 1.6 ± 0.7                             | 1.6 ± 0.1                            |
| <b>p value**</b>        | <0.001                            | <0.001                                | <0.001                                | <0.001                                | <0.001                               |
| <b>FT (nmol/dL)</b>     |                                   |                                       |                                       |                                       |                                      |
| Controls                | 1.4 ± 0.1                         | 1.7 ± 0.1                             | 1.8 ± 0.1                             | 1.1 ± 0.1                             | 1.1 ± 0.1                            |
| PCOS                    | 3.8 ± 0.3                         | 4.3 ± 0.5                             | 3.5 ± 0.5                             | 3.2 ± 0.6                             | 3.0 ± 0.5                            |
| <b>p value**</b>        | <0.001                            | <0.001                                | <0.001                                | <0.001                                | <0.001                               |
| <b>SHBG (nmol/L)</b>    |                                   |                                       |                                       |                                       |                                      |
| Controls                | 41.6 ± 1.5                        | 54.1 ± 2.6                            | 57.4 ± 3.2                            | 54.9 ± 1.5                            | 64.3 ± 4.5                           |
| PCOS                    | 36.3 ± 0.1                        | 33.1 ± 1.7                            | 37.8 ± 3.1                            | 36.9 ± 4.1                            | 37.7 ± 4.5                           |
| <b>p value**</b>        | <0.001                            | <0.001                                | <0.001                                | <0.001                                | <0.001                               |
| <b>FAI (%)</b>          |                                   |                                       |                                       |                                       |                                      |
| Controls                | 2.2 ± 0.2                         | 2.1 ± 0.1                             | 2.2 ± 0.3                             | 1.4 ± 2.1                             | 1.6 ± 0.1                            |
| PCOS                    | 5.3 ± 1.8                         | 6.6 ± 0.9                             | 5.8 ± 0.8                             | 4.9 ± 0.9                             | 5.6 ± 1.1                            |
| <b>p value**</b>        | 0.002                             | <0.001                                | <0.001                                | <0.001                                | <0.001                               |
| <b>F (nmol/L)</b>       |                                   |                                       |                                       |                                       |                                      |
| Controls                | 378 ± 13                          | 377 ± 27                              | 326 ± 14                              | 292 ± 16                              | 313 ± 9                              |
| PCOS                    | 401 ± 18                          | 331 ± 16                              | 335 ± 13                              | 324 ± 12                              | 293 ± 11                             |
| <b>p value**</b>        | <0.001                            | <0.001                                | <0.001                                | <0.001                                | <0.001                               |
| <b>A4 (nmol/L)</b>      |                                   |                                       |                                       |                                       |                                      |
| Controls                | 4.4 ± 0.2                         | 6.5 ± 0.3                             | 5.5 ± 0.4                             | 5.1 ± 0.3                             | 4.3 ± 0.3                            |
| PCOS                    | 10.5 ± 0.6                        | 9.2 ± 0.5                             | 9.1 ± 0.6                             | 7.5 ± 0.6                             | 7.5 ± 0.4                            |
| <b>p value**</b>        | <0.001                            | <0.001                                | <0.001                                | <0.001                                | <0.001                               |
| <b>DHEA (nmol/L)</b>    |                                   |                                       |                                       |                                       |                                      |
| Controls                | 13.9 ± 1.6                        | 18.5 ± 1.5                            | 17.8 ± 1.9                            | 14.9 ± 1.7                            | 13.1 ± 1.6                           |
| PCOS                    | 22.6 ± 1.4                        | 20.1 ± 2.1                            | 18.6 ± 1.6                            | 15.1 ± 1.2                            | 13.3 ± 0.9                           |
| <b>p value**</b>        | 0.088                             | <0.001                                | <0.001                                | 0.674                                 | 0.262                                |
| <b>DHEAS (µmol/L)</b>   |                                   |                                       |                                       |                                       |                                      |
| Controls                | 3.9 ± 0.3                         | 4.9 ± 0.2                             | 4.1 ± 0.2                             | 3.6 ± 1.7                             | 3.7 ± 0.2                            |
| PCOS                    | 5.8 ± 0.2                         | 5.2 ± 0.2                             | 4.9 ± 0.3                             | 3.9 ± 0.2                             | 3.8 ± 0.1                            |
| <b>p value**</b>        | 0.003                             | <0.001                                | <0.001                                | 0.027                                 | 0.042                                |
| <b>17-OHP4 (nmol/L)</b> |                                   |                                       |                                       |                                       |                                      |
| Controls                | 3.9 ± 1.2                         | 3.1 ± 0.2                             | 2.7 ± 2.1                             | 3.1 ± 2.1                             | 2.4 ± 0.1                            |
| PCOS                    | 4.0 ± 1.5                         | 5.1 ± 1.5                             | 4.6 ± 1.1                             | 3.2 ± 1.8                             | 3.9 ± 1.1                            |
| <b>p value**</b>        | <0.001                            | <0.001                                | <0.001                                | 0.005                                 | <0.001                               |

\*T= total testosterone; FT= free testosterone; SHBG= sex hormone-binding globulin; FAI= free androgen index; F= cortisol; A4= androstenedione; DHEA= dehydroepiandrosterone; DHEAS= dehydroepiandrosterone sulfate; 17-OHP4= 17-hydroxyprogesterone;

\*\*Student t test; p-value= significance of the comparison of PCOS and control women within the same age groups
